# Supplementary material for: A non-selective endothelin receptor antagonist bosentan modulates kinetics of bone marrow-derived cells in ameliorating pulmonary hypertension in mice
Source: PubMed Central journal article supplement — Pulm Circ. 2020 May 14;10(2):2045894020919355. doi: 10.1177/2045894020919355 (PMC7238854; doi:10.1177/2045894020919355), 2020-05-14
Supplement: sj-pdf-1-pul-10.1177_2045894020919355.pdf [file sj-pdf-1-pul-10.1177_2045894020919355.pdf]

## Supporting information

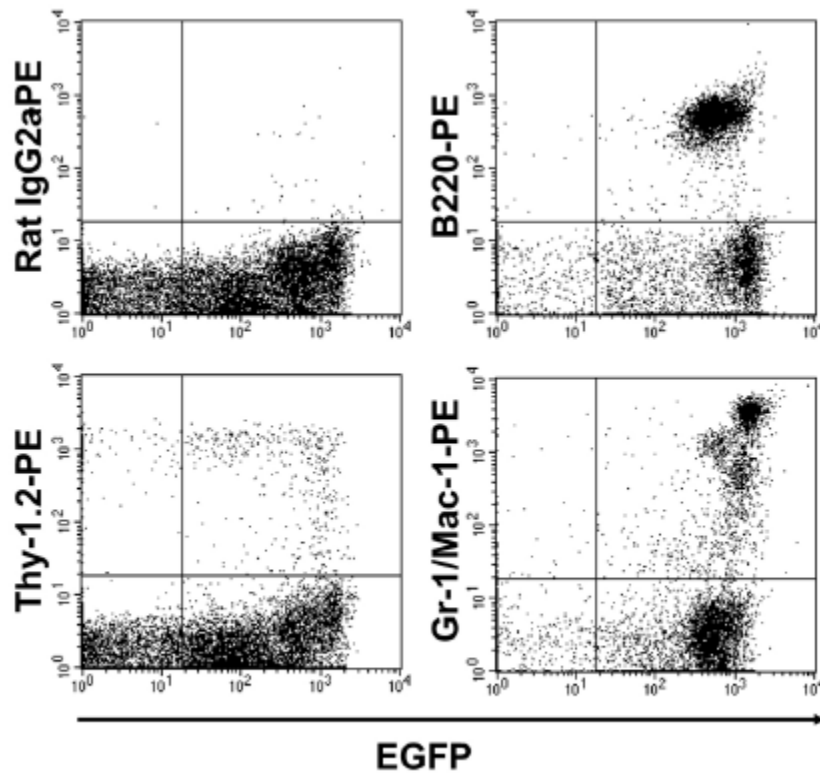

S1 Fig. Flow cytometric analysis of hematopoietic engraftment

### S1 Fig. Flow cytometric analysis of hematopoietic engraftment

The reconstitution of B-cell (B220<sup>+</sup> cells), T-cell (Thy-1,2<sup>+</sup> cells) and granulocyte/macrophage (Mac-1/Gr-1<sup>+</sup> cells) lineages after BMT was evaluated by flow cytometric analysis in peripheral blood, which was conducted 6 to 8 weeks after the BMT. The percentages of the engrafting cells in the B-cells, T-cells and granulocyte/macrophage lineages were 99.3%, 75.4% and 96.7%, respectively.

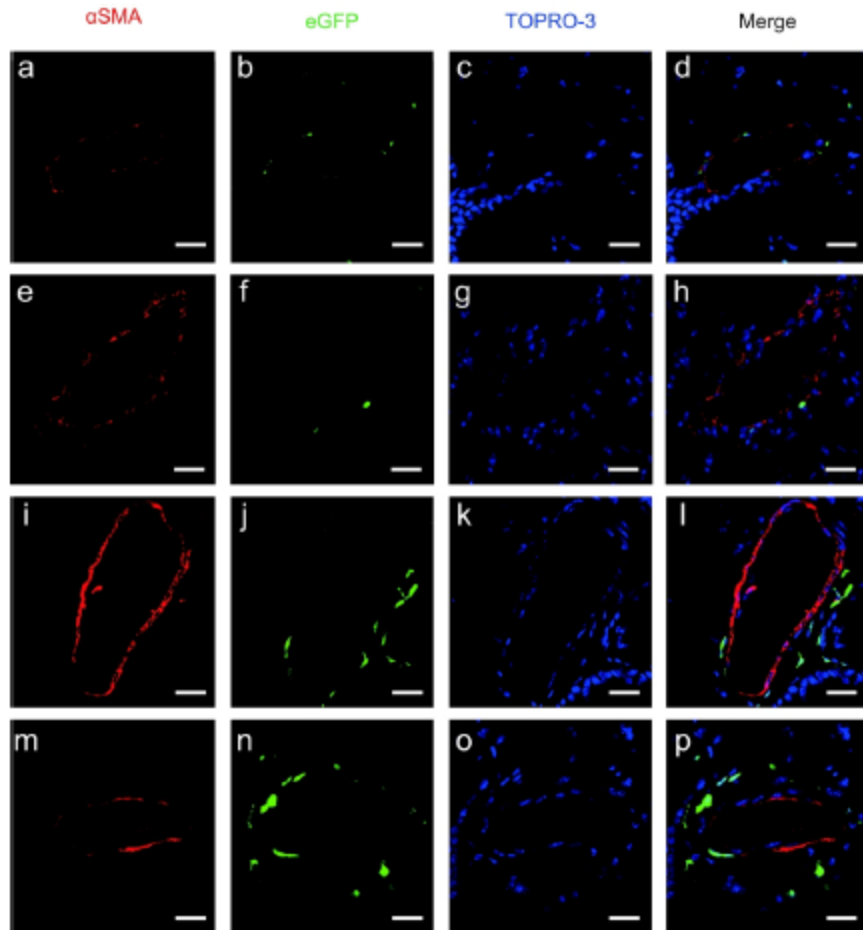

S2 Fig. BM-derived smooth muscle cells were not detected in any sections evaluated.

**S2 Fig. BM-derived smooth muscle cells were not detected in any sections evaluated.**

Representative confocal imaging of immunostaining with  $\alpha$ -SMA. Alpha-SMA<sup>+</sup>, eGFP<sup>+</sup> BM-derived smooth muscle cells were not detected in any sections in saline-treated normoxic mice (a-d), bosentan-treated normoxic mice (e-h), saline-treated hypoxic mice (i-l) and bosentan-treated hypoxic mice (m-p). scale bar=25 $\mu$ m.

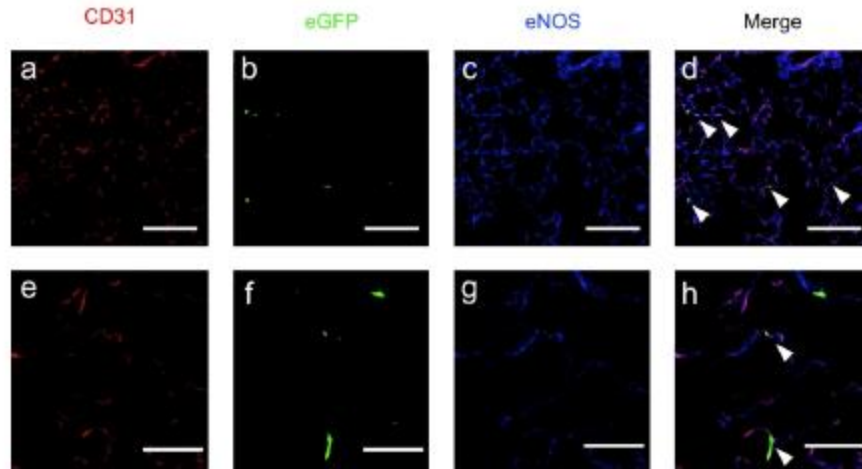

S3 Fig. BM-derived ECs express eNOS.

**S3 Fig. BM-derived ECs express eNOS.**

Representative confocal laser scanning imaging of the eNOS expression by CD31<sup>+</sup> eGFP<sup>+</sup> bone marrow-derived ECs in bosentan-treated hypoxic mice. scale bar=50μm (a-d). The expression of eNOS by BM-derived ECs were also shown in high power field. scale bar=30μm (e-h). Arrowheads indicate CD31<sup>+</sup>, eGFP<sup>+</sup>, eNOS<sup>+</sup> BM- derived ECs.
